# Supplementary material for: Ancillary ligand modulated stereoselective self-assembly of triple-stranded Eu(iii) helicate featuring circularly polarized luminescence
Source: Royal Society of Chemistry journal article supplement (doi:10.1039/d1ra01583d), 2021-01-01
Supplement: d1ra01583d1.pdf [file d1ra01583d1.pdf]

## Supplementary Information

### Ancillary ligand modulated stereoselective self-assembly of triple-stranded Eu(III) helicate featuring circularly polarized luminescence

Zhiwei Yao, Yanyan Zhou, Ting Gao, Pengfei Yan\* and Hongfeng Li \*

Key Laboratory of Functional Inorganic Material Chemistry, Ministry of Education, P. R. China; School of Chemistry and Materials Science, Heilongjiang University, Harbin 150080, P. R. China.

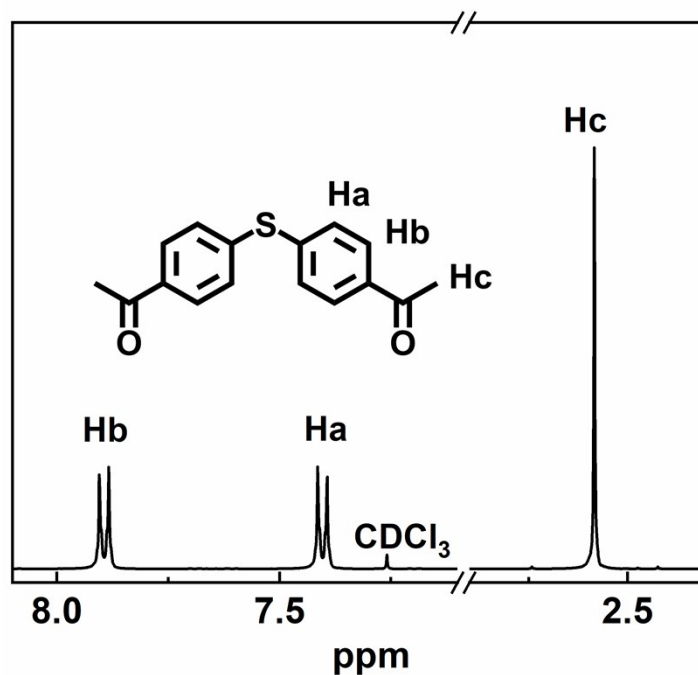

Figure S1. <sup>1</sup>H NMR spectrum of 4,4'-diacetyldiphenyl sulphide in CDCl<sub>3</sub>.

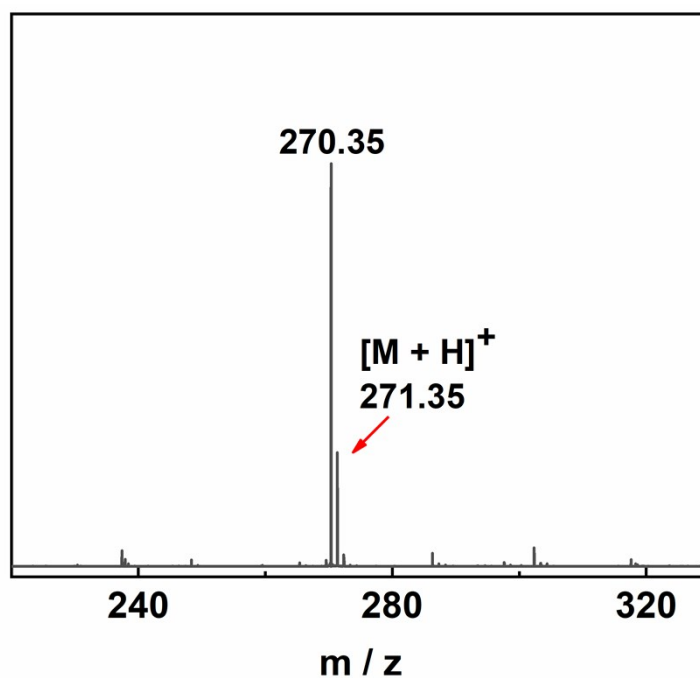

Figure S2. EI-MS of 4,4'-diacetyldiphenyl sulphide.

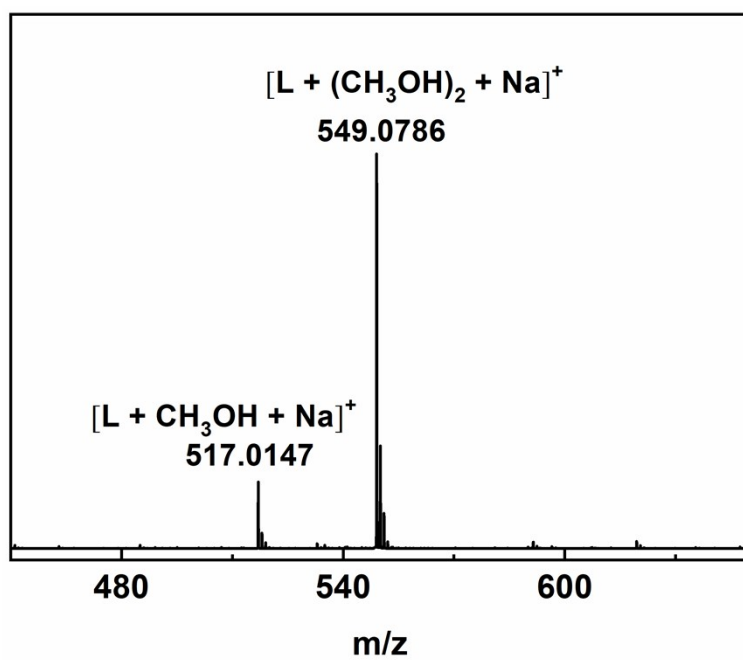

Figure S3. ESI-TOF-MS of L.

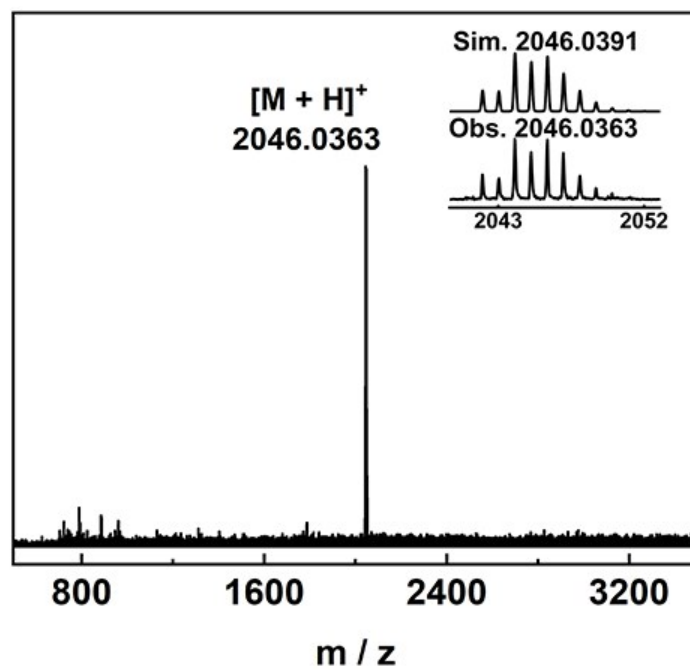

Figure S4. ESI-TOF-MS of  $\text{Eu}_2\text{L}_3(\text{Phen})_2$ .

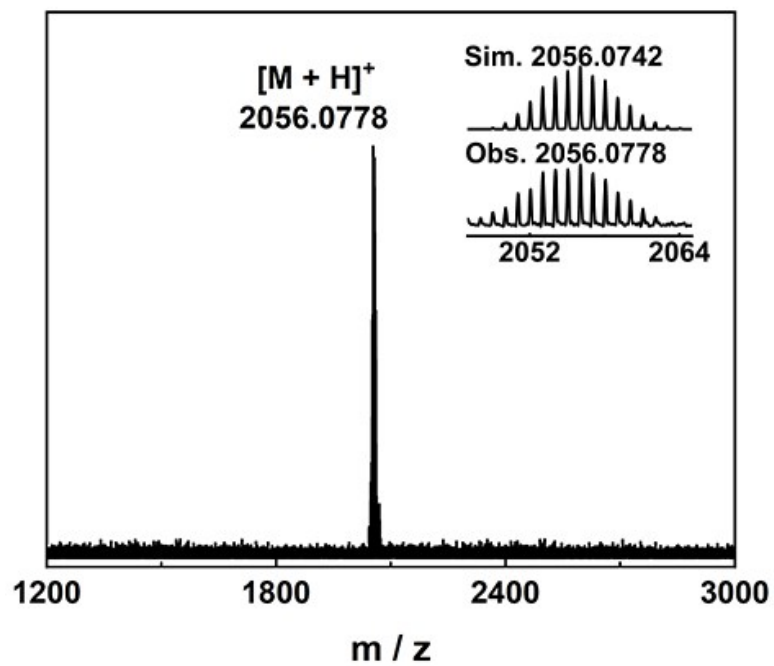

Figure S5. ESI-TOF-MS of  $\text{Gd}_2\text{L}_3(\text{Phen})_2$ .

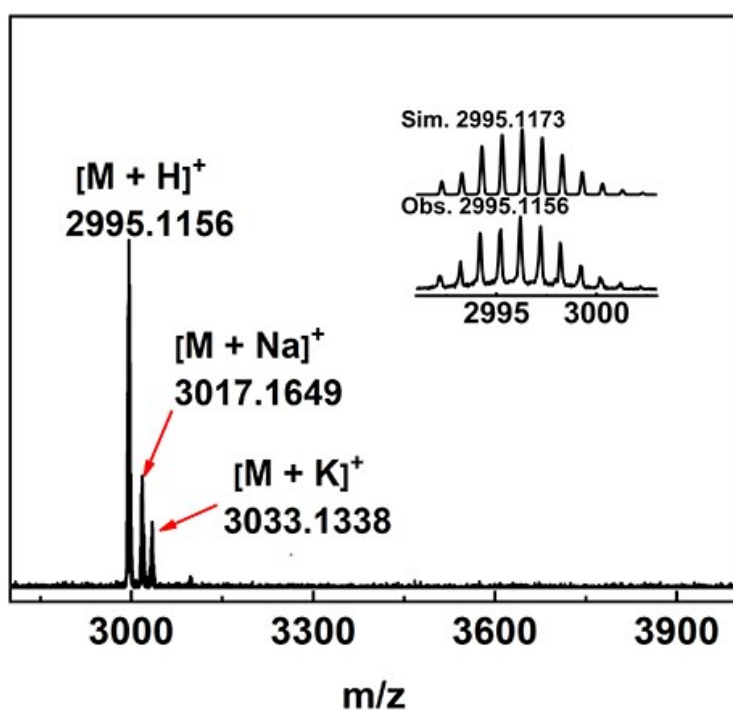

Figure S6. ESI-TOF-MS of  $\text{Eu}_2\text{L}_3(\text{R-BINAPO})_2$ .

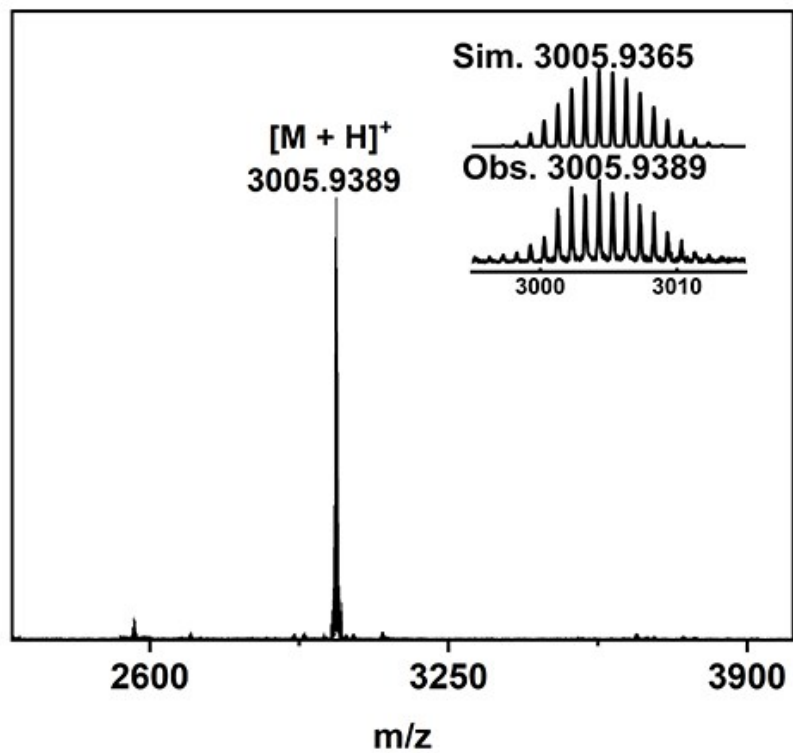

Figure S7. ESI-TOF-MS of  $Gd_2L_3(R-BINAPO)_2$ .

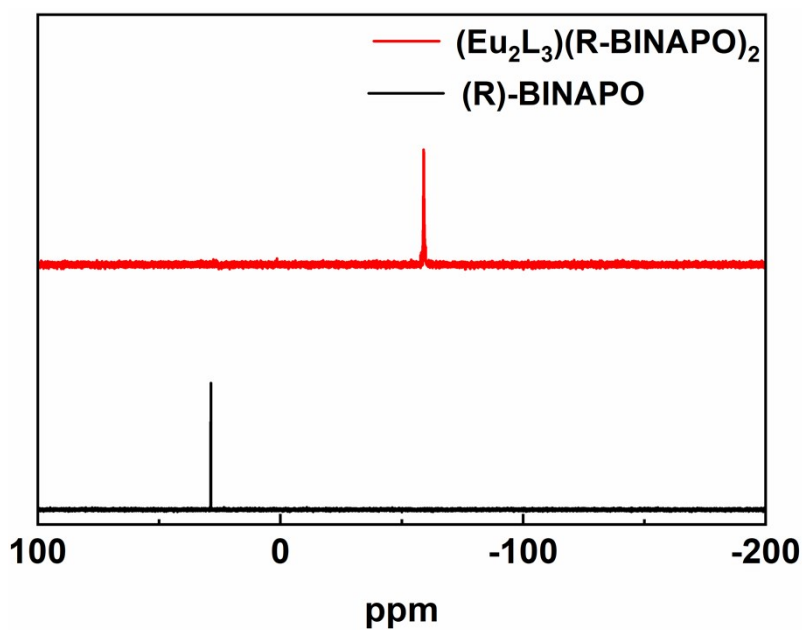

Figure S8.  $^{31}P$  NMR spectrum of  $Eu_2L_3(R-BINAPO)_2$  (red line) and  $(R)-BINAPO$  (black line) in  $THF-d_8$ .

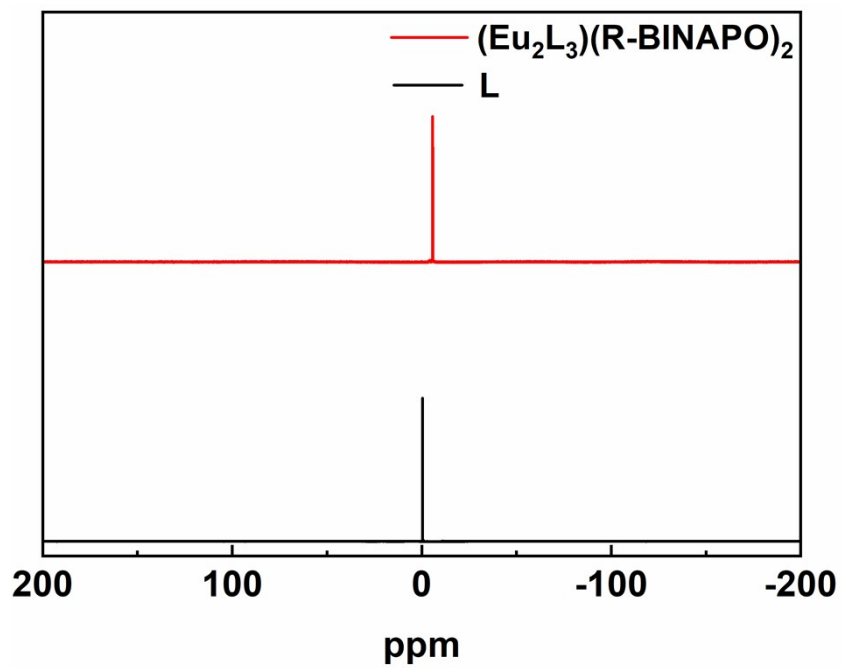

**Figure S9.**  $^{19}\text{F}$  NMR spectrum of  $\text{Eu}_2\text{L}_3(\text{R-BINAPO})_2$  (red line) and L (black line) in  $\text{THF-}d_8$ .

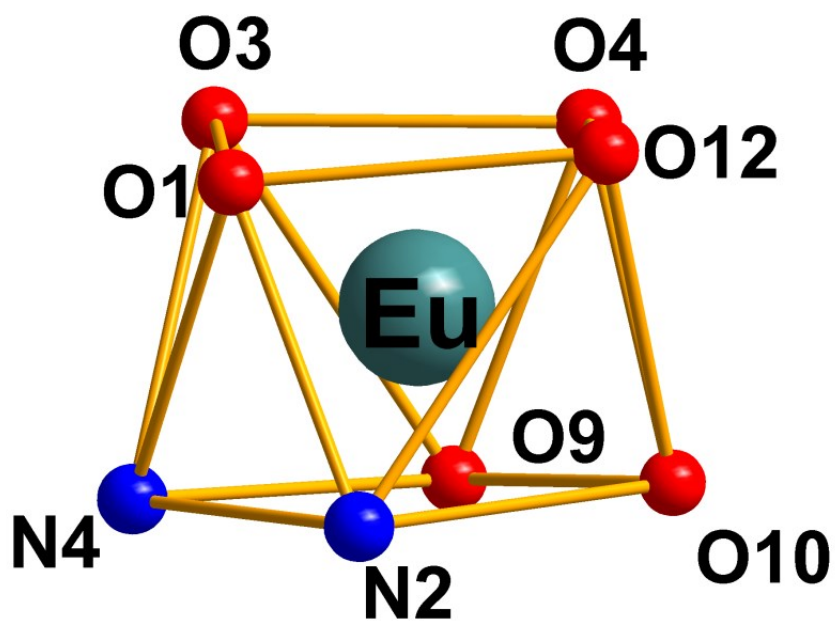

**Figure S10.** The coordination polyhedron of  $\text{Eu}_2\text{L}_3(\text{Phen})_2$ .

**Table S1. Crystallographic data for the Complex of Eu<sub>2</sub>L<sub>3</sub>(phen)<sub>2</sub>**

| Complex                                     | Eu <sub>2</sub> L <sub>3</sub> (phen) <sub>2</sub>                                                              |
|---------------------------------------------|-----------------------------------------------------------------------------------------------------------------|
| CCDC number                                 | 994501                                                                                                          |
| Empirical formula                           | C <sub>94.5</sub> H <sub>58</sub> Eu <sub>2</sub> F <sub>18</sub> N <sub>4</sub> O <sub>12</sub> S <sub>3</sub> |
| color                                       | Colorless                                                                                                       |
| Formula weight                              | 2183.55                                                                                                         |
| Temperature/K                               | 293.0                                                                                                           |
| Crystal system                              | triclinic                                                                                                       |
| Space group                                 | P-1                                                                                                             |
| a/Å                                         | 17.5629(7)                                                                                                      |
| b/Å                                         | 18.0137(7)                                                                                                      |
| c/Å                                         | 18.8460(6)                                                                                                      |
| $\alpha$ /°                                 | 105.518(3)                                                                                                      |
| $\beta$ /°                                  | 96.587(3)                                                                                                       |
| $\gamma$ /°                                 | 118.352(4)                                                                                                      |
| Volume/Å <sup>3</sup>                       | 4846.0(4)                                                                                                       |
| Z                                           | 2                                                                                                               |
| $\rho_{\text{calc}}$ /cm <sup>-3</sup>      | 1.496                                                                                                           |
| $\mu$ /mm <sup>-1</sup>                     | 1.441                                                                                                           |
| F(000)                                      | 2170.0                                                                                                          |
| Crystal size/mm <sup>3</sup>                | 0.015 × 0.01 × 0.01                                                                                             |
| Radiation                                   | Mo K $\alpha$ ( $\lambda$ = 0.71073)                                                                            |
| 2 $\Theta$ range for data collection/°      | 6.03 to 50.00                                                                                                   |
| Index ranges                                | -20 ≤ h ≤ 19<br>-21 ≤ k ≤ 21<br>-22 ≤ l ≤ 22                                                                    |
| Reflections collected                       | 34920                                                                                                           |
| Completeness to theta                       | 99.7%                                                                                                           |
| Independent reflections                     | 17033 [R <sub>int</sub> = 0.0283, R <sub>sigma</sub> = 0.0482]                                                  |
| Data/restraints/parameters                  | 17033/442/1312                                                                                                  |
| Goodness-of-fit on F <sup>2</sup>           | 1.044                                                                                                           |
| Final R indexes [I ≥ 2 $\sigma$ (I)]        | R <sub>1</sub> = 0.0470, wR <sub>2</sub> = 0.1242                                                               |
| Final R indexes [all data]                  | R <sub>1</sub> = 0.0716, wR <sub>2</sub> = 0.1416                                                               |
| Largest diff. peak/hole / e Å <sup>-3</sup> | 1.24/-0.57                                                                                                      |

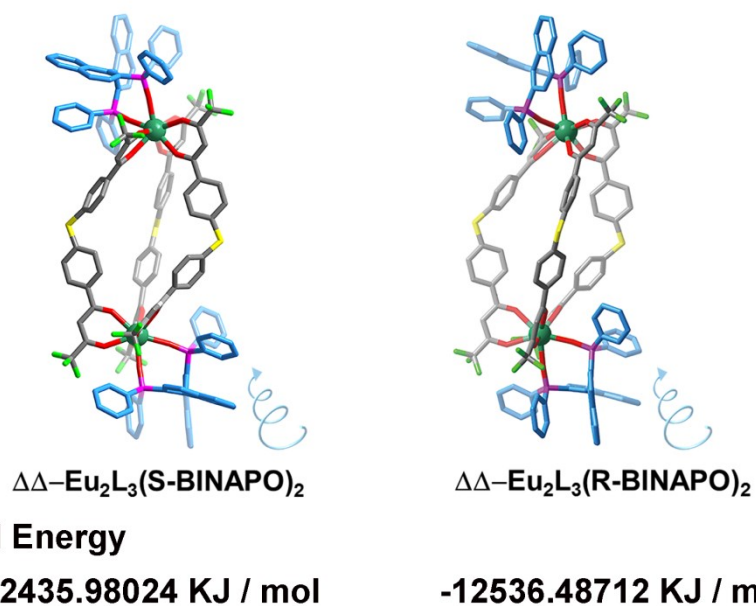

**Figure S11.** Optimized structures of  $\Delta\Delta\text{-Eu}_2\text{L}_3(\text{R-BINAPO})_2$  and  $\Delta\Delta\text{-Eu}_2\text{L}_3(\text{S-BINAPO})_2$ , and the total energy of each possible helicate. The molecular mechanic modeling was built by using the MOPAC 2016 program implemented in the LUMPAC 3.0 software with a Sparkle/RM1 model.

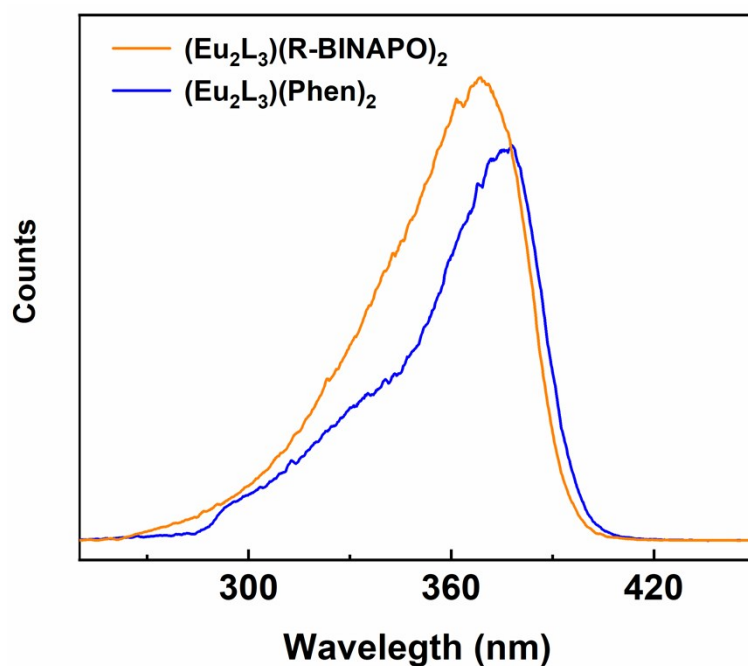

**Figure S12.** Excitation spectra of  $\text{Eu}_2\text{L}_3(\text{R-BINAPO})_2$  (orange line) and  $\text{Eu}_2\text{L}_3(\text{Phen})_2$  (blue line) recorded by monitoring the emission band of  $\text{Eu}^{3+}$  ions at 612 nm in THF ( $1.0 \times 10^{-5}$  M).

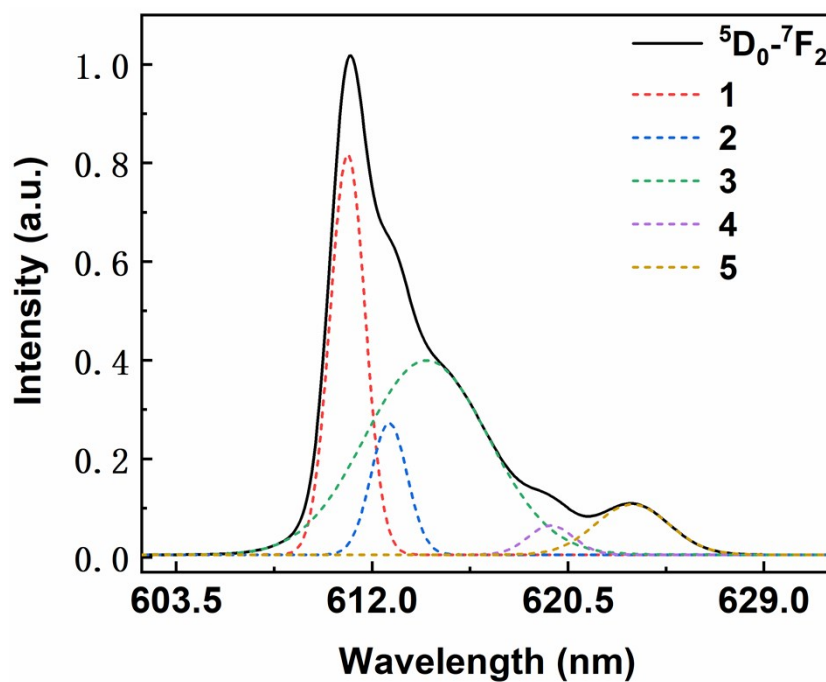

**Figure S13.** Emission spectra of the deconvolution analyses of  ${}^5D_0 \rightarrow {}^7F_2$  transitions with the five peaks at 612 nm of  $\text{Eu}_2\text{L}_3(\text{R-BINAPO})_2$  in THF.

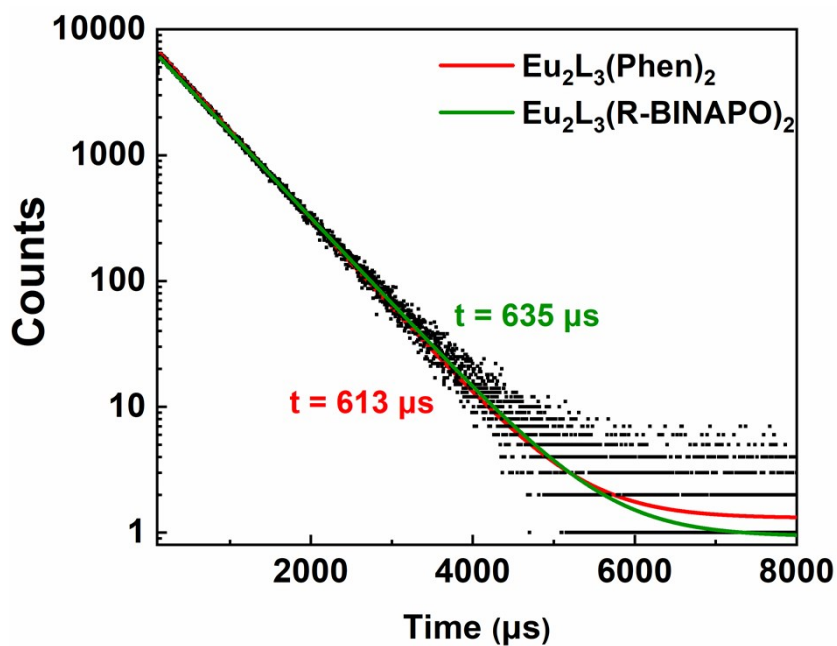

**Figure S14.** Luminescence decay curves of  $\text{Eu}_2\text{L}_3(\text{Phen})_2$  (red line) and  $\text{Eu}_2\text{L}_3(\text{R-BINAPO})_2$  (green line) in THF monitored at 613 nm.



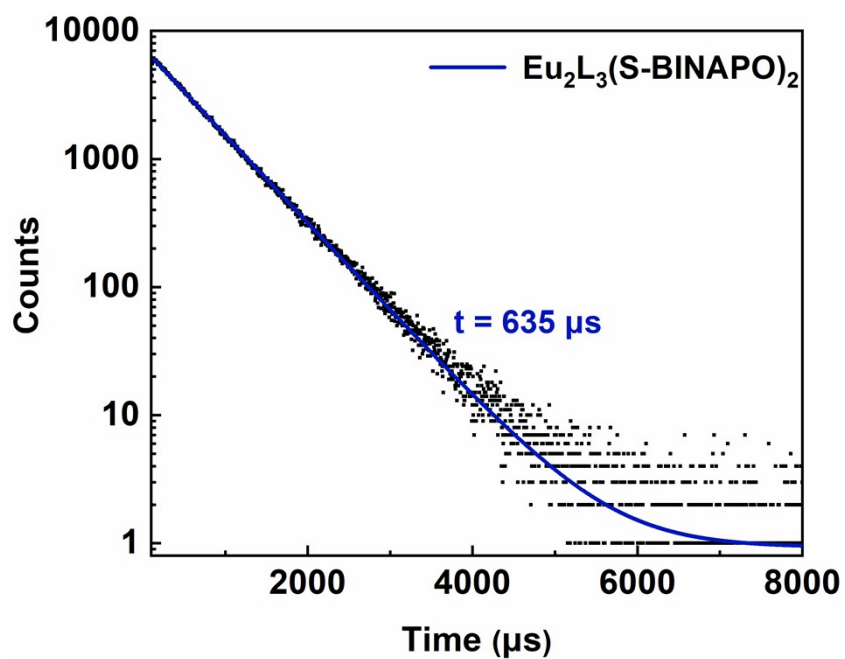

**Figure S15** Luminescence decay curves of  $\text{Eu}_2\text{L}_3(\text{S-BINAPO})_2$  (blue line) in THF monitored at 613 nm.

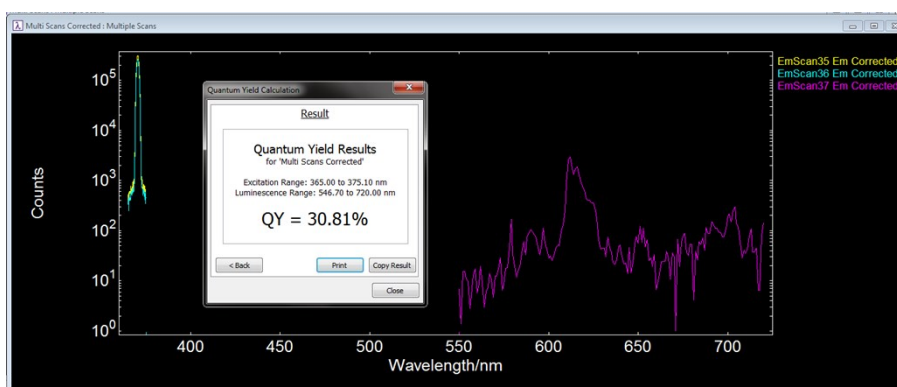

**Figure S16.** The screenshot of the luminescence quantum yield measurement of  $\text{Eu}_2\text{L}_3(\text{Phen})_2$ .

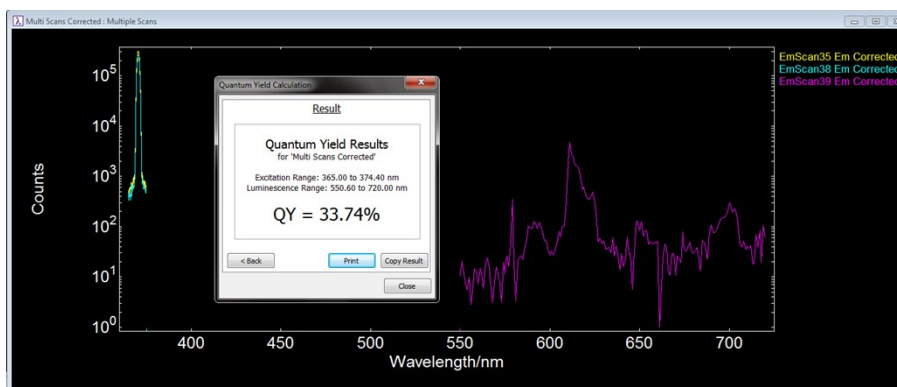

**Figure S17.** The screenshot of the luminescence quantum yield measurement of  $\text{Eu}_2\text{L}_3(\text{R-BINAPO})_2$

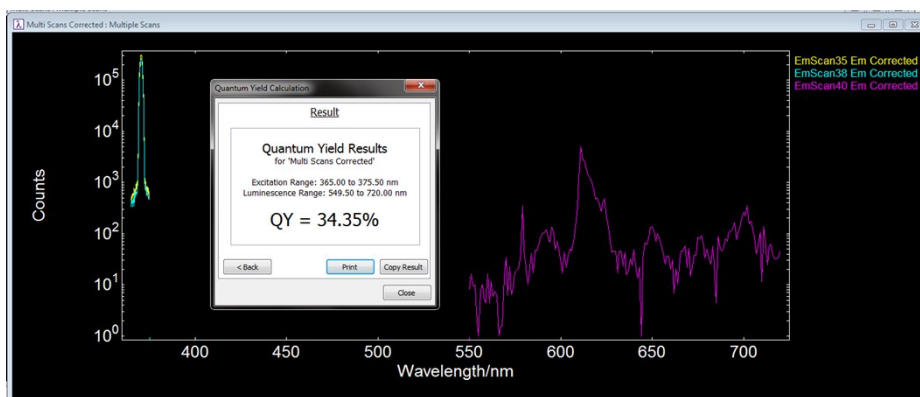

**Figure S18.** The screenshot of the luminescence quantum yield measurement of  $\text{Eu}_2\text{L}_3(\text{S-BINAPO})_2$

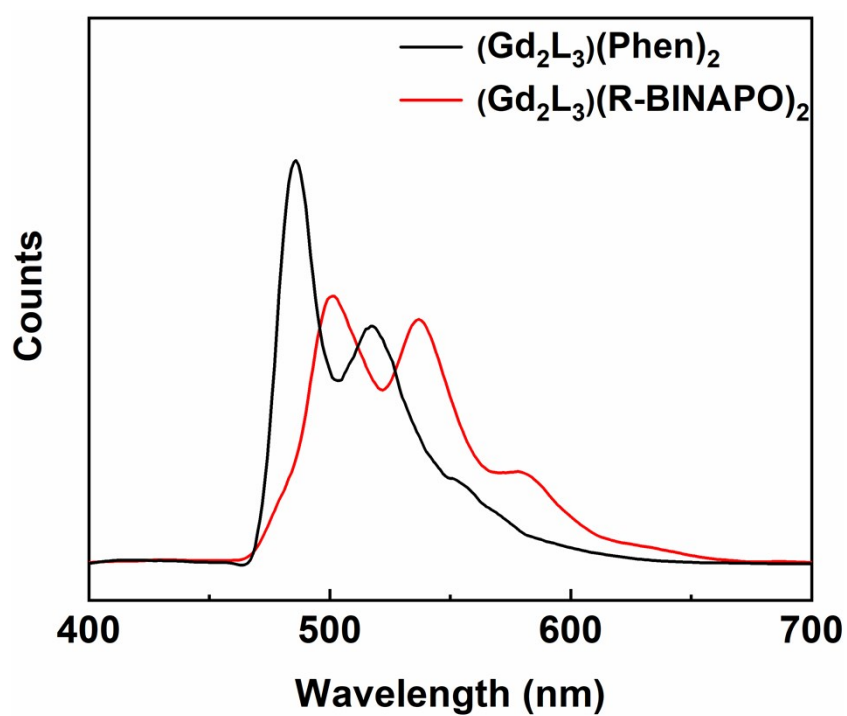

**Figure S19.** Phosphorescence spectra of  $\text{Gd}_2\text{L}_3(\text{Phen})_2$  (black line)  $\text{Gd}_2\text{L}_3(\text{R-BINAPO})_2$  (red line) in THF at 77 K.
